# Supplementary material for: Assaying Visual Memory in the Desert Locust
Source: Insects. 2015 Apr 20;6(2):409–18. doi: 10.3390/insects6020409 (PMC4553487; doi:10.3390/insects6020409)
Supplement: Supplementary File 1 [file insects-06-00409-s001.xlsx]

## Sheet: Figure 2A
Untrained					Trained
code	length visit	length visit	Preference index		code	length visit	length visit	Preference index		Code	Pref. Index (untrained)	Pref. Index (trained)
BGB	00:00:00	00:00:00	0.5		BGB	00:01:37	00:10:45	0.130728		BGB	0.5	0.130728
BGY	00:13:27	00:00:00	1900-01-01		BGY	00:04:58	00:08:55	0.357743		BGY	1	0.357743
BRB	00:04:50	00:02:09	0.692124		BRB	00:02:05	00:26:20	0.0733138		BRB	0.692124	0.0733138
BRG	00:00:00	00:00:00	0.5		BRG	00:00:52	00:12:56	0.0628019		BRG	0.5	0.0628019
BRY	00:04:26	00:12:25	0.263106		BRY	00:03:04	00:18:25	0.142746		BRY	0.263106	0.142746
BYB	00:00:00	00:00:00	0.5		BYB	00:00:00	00:00:00	0.5		BYB	0.5	0.5
BYG	00:00:00	00:00:00	0.5		BYG	00:00:00	00:08:36	0		BYG	0.5	0
BYR	00:00:00	00:00:00	0.5		BYR	00:00:00	00:02:07	0		BYR	0.5	0
GBG	00:00:30	00:00:00	1		GBG	00:07:23	00:09:02	0.449746		GBG	1	0.449746
GBY	00:16:08	00:08:32	0.654054		GBY	00:00:00	00:00:00	0.5		GBY	0.654054	0.5
RBG	00:00:00	00:00:00	0.5		RBG	00:00:00	00:03:15	0		RBG	0.5	0
RBR	00:05:08	00:10:07	0.336612		RBR	00:04:19	00:16:43	0.20523		RBR	0.336612	0.20523
RGB	00:09:10	00:00:00	1		RGB	00:01:24	00:01:59	0.413793		RGB	1	0.413793
RGR	00:00:00	00:00:00	0.5		RGR	00:02:21	00:00:00	1		RGR	0.5	1
RGY	00:09:46	00:00:00	1		RGY	00:00:00	00:00:00	0.5		RGY	1	0.5
RYB	00:18:32	00:00:00	1		RYB	00:00:00	00:05:11	0		RYB	1	0
RYG	00:02:20	01:00:58	0.0368615		RYG	00:50:15	00:31:21	0.615809		RYG	0.0368615	0.615809
RYR	00:01:44	00:00:00	1		RYR	00:01:22	00:05:36	0.196172		RYR	1	0.196172
YBG	00:29:16	00:20:59	13:58:41.194000		YBG	00:04:05	00:32:13	0.112489		YBG	0.582421	0.112489
YBR	00:09:24	00:10:02	0.483705		YBR	00:12:07	00:38:27	0.239618		YBR	0.483705	0.239618
YBY	00:00:00	00:00:00	0.5		YBY	00:00:00	00:00:00	0.5		YBY	0.5	0.5
YGR	00:15:13	00:05:58	0.718332		YGR	00:04:29	00:12:23	0.26581		YGR	0.718332	0.26581
YGY	01:01:13	00:16:02	0.792449		YGY	00:00:00	01:45:10	0		YGY	0.792449	0
YRB	00:00:00	00:00:00	0.5		YRB	00:00:00	00:00:00	0.5		YRB	0.5	0.5
YRY	01:11:29	00:00:00	1		YRY	00:00:00	00:51:59	0		YRY	1	0

## Sheet: Figure 2B
Untrained					Trained
code	# visits yellow	# visits green	Pref index		code	# visits yellow	# visits green	Pref index			Pref. Index (untrained)	Pref.Index (trained)
BGB	0	0	0.5		BGB	3	6	0.333333		BGB	0.5	0.333333
BGY	3	0	1		BGY	4	5	0.444444		BGY	1	0.444444
BRB	3	1	0.75		BRB	4	13	0.235294		BRB	0.75	0.235294
BRG	0	0	0.5		BRG	1	2	0.333333		BRG	0.5	0.333333
BRY	4	7	0.363636		BRY	5	20	0.2		BRY	0.363636	0.2
BYB	0	0	0.5		BYB	0	0	0.5		BYB	0.5	0.5
BYG	0	0	0.5		BYG	0	1	0		BYG	0.5	0
BYR	0	0	0.5		BYR	0	1	0		BYR	0.5	0
GBG	1	0	1		GBG	9	4	0.692308		GBG	1	0.692308
GBY	7	1	0.875		GBY	0	0	0.5		GBY	0.875	0.5
RBG	0	0	0.5		GRY	0	1	0		RBG	0.5	0
RBR	6	3	0.666667		RBR	3	3	0.5		RBR	0.666667	0.5
RGB	5	4	0.555556		RGB	1	2	0.333333		RGB	0.555556	0.333333
RGR	0	0	0.5		RGR	1	0	1		RGR	0.5	1
RGY	3	0	1		RGY	0	0	0.5		RGY	1	0.5
RYB	5	0	1		RYB	0	3	0		RYB	1	0
RYG	3	5	0.375		RYG	6	17	0.26087		RYG	0.375	0.26087
RYR	3	0	1		RYR	1	8	0.111111		RYR	1	0.111111
YBR	6	9	0.4		YBG	4	6	0.4		YBG	0.4	0.4
YBY	0	0	0.5		YBR	10	27	0.27027		YBR	0.5	0.27027
YGR	6	3	0.666667		YBY	0	0	0.5		YBY	0.666667	0.5
YGY	7	3	0.7		YGR	8	12	0.4		YGR	0.7	0.4
YRB	0	0	0.5		YGY	0	3	0		YGY	0.5	0
YRY	2	0	1		YRB	0	0	0.5		YRB	1	0.5
YBG	5	6	0.454545		YRY	0	5	0		YRY	0.454545	0

## Sheet: Figure 3
Pref. Index (untrained)	Pref.Index (trained)
0.5	0.25
0.5	0.25
1	0.25
0.25	0.25
0	0.25
0	0.25
0	0
0	0
0	0
0.25	0.25
0	0
0.25	0.25
0.25	0.25
0	0
0.5	0
0.25	0.25
0	0.5
0.25	0
0	0.25

## Sheet: Figure 4
Well	Sample Name	Target Name	Cт	Q		NF	RQ
A3	Con1	ef1a	21.2356	1		1	1					normalized
A6	Con2	ef1a	22.4134	0.442039		0.370984	0.827789
A9	Con3	ef1a	20.3661	1.82709		1.56806	0.990028		Control	sNPF KD		Control	sNPF KD
A12	Con4	ef1a	20.3703	1.82173		1.66671	0.804788		1	0.090872		1.1883	0.107983
B3	Con5	ef1a	21.9329	0.616746		0.580484	0.642317		0.827789	0.0560523		0.98366	0.0666068
B6	Con6	ef1a	20.5753	1.58039		1.38825	0.784317		0.990028	0.0836231		1.17645	0.0993692
B9	KD1	ef1a	20.6959	1.45366		1.22639	0.090872		0.804788	0.0761851		0.956327	0.0905306
B12	KD2	ef1a	20.9497	1.2192		1.22537	0.0560523		0.642317	0.0830851		0.763264	0.0987299
C3	KD3	ef1a	20.1888	2.0659		1.71943	0.0836231		0.784317	0.0344443		0.932002	0.0409301
C6	KD4	ef1a	20.0822	2.22444		1.68733	0.0761851
C9	KD5	ef1a	19.9451	2.4462		2.04273	0.0830851
C12	KD6	ef1a	20.3754	1.81534		1.66898	0.0344443
G3	NTC	ef1a	Undetermined
A1	Con1	rp49	23.6854	1
A4	Con2	rp49	25.3687	0.311351
A7	Con3	rp49	23.2569	1.34575
A10	Con4	rp49	23.0767	1.52488
B1	Con5	rp49	24.5575	0.546355
B4	Con6	rp49	23.3991	1.21947
B7	KD1	rp49	23.6362	1.03466
B10	KD2	rp49	23.3849	1.23157
C1	KD3	rp49	23.1683	1.43107
C4	KD4	rp49	23.3293	1.27991
C7	KD5	rp49	22.9149	1.7058
C10	KD6	rp49	23.0677	1.53441
G1	NTC	rp49	Undetermined
A2	Con1	snpf	23.1477	1
A5	Con2	snpf	24.8509	0.307097
A8	Con3	snpf	22.5131	1.55242
A11	Con4	snpf	22.724	1.34135
B2	Con5	snpf	24.571	0.372855
B5	Con6	snpf	23.0249	1.08883
B8	KD1	snpf	26.3133	0.111445
B11	KD2	snpf	27.0115	0.0686846
C2	KD3	snpf	25.9457	0.143784
C5	KD4	snpf	26.1073	0.128549
C8	KD5	snpf	25.7064	0.16972
C11	KD6	snpf	27.2683	0.0574867

## Sheet: Figure 5A
	Pref. Index (untrained)	Pref. Index (trained)	Training efficiency		Controle	sNPF KD
control	0.336612	0.20523	0.390308		0.390308	0.642257
control	1	0.413793	0.586207		0.586207	0.894074
control	1	0	1		1	0.457457
control	1	0.196172	0.803828		0.803828	0.550254
control	0.483705	0.239618	0.50462		0.50462	0.754909
control	0.718332	0.26581	0.629962		0.629962	0.806861
control	0.792449	0	1		1
control	1	0	1		1
sNPF KD	1	0.357743	0.642257
sNPF KD	0.692124	0.0733138	0.894074
sNPF KD	0.263106	0.142746	0.457457
sNPF KD	1	0.449746	0.550254
sNPF KD	0.582421	0.142746	0.754909
sNPF KD	0.582421	0.112489	0.806861

## Sheet: Figure 5B
	Pref. Index (untrained)	Pref.Index (trained)	Training Efficiency		Controle	sNPF KD
control	0.666667	0.5	0.25		0.25	0.555556
control	0.555556	0.333333	0.4		0.4	0.686275
control	1	0	1		1	0.45
control	1	0.26087	0.73913		0.73913	0.307692
control	0.666667	0.4	0.4		0.4	0.4
control	0.7	0	1		1	0.5
control	1	0	1		1
control	0.454545	0.4	0.12		0.12
sNPF KD	1	0.444444	0.555556
sNPF KD	0.75	0.235294	0.686275
sNPF KD	0.363636	0.2	0.45
sNPF KD	1	0.692308	0.307692
sNPF KD	1	0.5	0.5
sNPF KD	0.666667	0.4	0.4
